# Supplementary material for: Aloysia Citrodora Essential Oil Inhibits Melanoma Cell Growth and Migration by Targeting HB-EGF-EGFR Signaling
Source: MDPI journal article supplement (doi:10.3390/ijms22158151), 2021-07-29
Supplement: s1 [file s1]

Supplementary Table S1. Chemical components of ALOC-EOs collected from the Nablus region, Palestine.

| Scientific names                              | Names of EOs      | Formula                                | Chemical structure                                                                   | RT        | RI <sub>calc</sub> | RT <sub>Litr</sub> | % of EOs  |
|-----------------------------------------------|-------------------|----------------------------------------|--------------------------------------------------------------------------------------|-----------|--------------------|--------------------|-----------|
| 2-methyl-5-propan-2-ylbicyclo[3.1.0]hex-2-ene | $\alpha$ -Thujene | C <sub>10</sub> H <sub>16</sub>        | 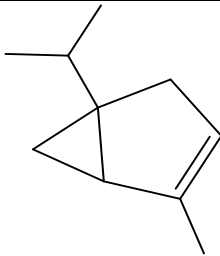   | 8.71      | 821                | 821                | 0.27      |
| 4-methyl-1-propan-2-ylbicyclo[3.1.0]hex-2-ene | $\beta$ -Thujene  | C <sub>10</sub> H <sub>16</sub>        |    | 10.5<br>1 | 874                | 875                | 0.83      |
| 1-Octen-3-ol                                  | Morillool         | C <sub>8</sub> H <sub>16</sub> O       |   | 10.7<br>9 | 712                | 712                | 0.18      |
| 2-(5-ethenyl-5-methyloxolan-2-yl)propan-1-ol  | Lilac alcohol C   | C <sub>10</sub> H <sub>18</sub> O<br>2 |  | 10.9<br>6 | 597                | 598                | 1.06      |
| (4R)-1-methyl-4-prop-1-en-2-ylcyclohexene     | D-Limonene        | C <sub>10</sub> H <sub>16</sub>        |  | 12.7<br>1 | 895                | 894                | 14.8<br>4 |
| 1,3,3-trimethyl-2-oxabicyclo[2.2.2]octane     | Eucalyptol        | C <sub>10</sub> H <sub>18</sub> O      |  | 12.8<br>3 | 826                | 827                | 4.48      |

|                                                                                    |                     |                                   |                                                                                      |           |     |     |           |
|------------------------------------------------------------------------------------|---------------------|-----------------------------------|--------------------------------------------------------------------------------------|-----------|-----|-----|-----------|
| 3,7-dimethylocta-1,3,6-triene                                                      | $\beta$ -Ocimene    | C <sub>10</sub> H <sub>16</sub>   | 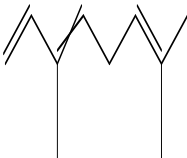   | 13.4<br>5 | 873 | 872 | 0.92      |
| (1S,5S)-6,6-dimethyl-2-methylidenebicyclo[3.1.1]heptane                            | $\beta$ -Pinene     | C <sub>10</sub> H <sub>16</sub>   |    | 15.6<br>3 | 902 | 902 | 0.31      |
| 2-(4-methylcyclohex-3-en-1-yl)propan-2-ol                                          | $\alpha$ -Terpineol | C <sub>10</sub> H <sub>18</sub> O |    | 19.2<br>9 | 903 | 902 | 1.99      |
| 2,6-Octadienal, 3,7-dimethyl-                                                      | <b>Neral</b>        | C <sub>10</sub> H <sub>16</sub> O |    | 20.9<br>3 | 723 | 722 | 20.0      |
| (2E)-3,7-dimethylocta-2,6-dienal                                                   | <b>Geranial</b>     | C <sub>10</sub> H <sub>16</sub> O |  | 21.9<br>7 | 838 | 838 | 26.6<br>1 |
| (1S,6S,7S,8S)-1,3-dimethyl-8-propan-2-yltricyclo[4.4.0.0 <sup>2,7</sup> ]dec-3-ene | Copaene             | C <sub>15</sub> H <sub>24</sub>   |  | 25.5<br>9 | 832 | 832 | 0.46      |
| 7-methyl-3-methylideneocta-1,6-diene                                               | $\beta$ -Myrcene    | C <sub>10</sub> H <sub>16</sub>   |  | 25.6<br>8 | 738 | 737 | 1.14      |
| 1-methyl-5-methylidene-8-propan-2-yltricyclo[5.3.0.0 <sup>2,6</sup> ]decane        | $\beta$ -Bourbonene | C <sub>15</sub> H <sub>24</sub>   |  | 25.8<br>7 | 859 | 859 | 0.42      |

|                                                                                                                               |                              |                                 |                                                                                      |           |     |     |           |
|-------------------------------------------------------------------------------------------------------------------------------|------------------------------|---------------------------------|--------------------------------------------------------------------------------------|-----------|-----|-----|-----------|
| 2-methyl-5-(6-methylhept-5-en-2-yl)cyclohexa-1,3-diene                                                                        | $\alpha$ -Zingiberene        | C <sub>15</sub> H <sub>24</sub> | 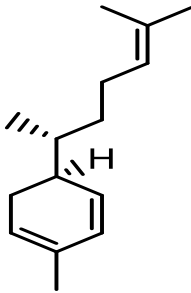    | 26.9<br>3 | 789 | 791 | 0.51      |
| (1 <i>R</i> ,4 <i>E</i> ,9 <i>S</i> )-4,11,11-trimethyl-8-methylidenebicyclo[7.2.0]undec-4-ene                                | $\beta$ -Caryophyllene       | C <sub>15</sub> H <sub>24</sub> |    | 27.0<br>4 | 890 | 890 | 3.33      |
| (1 <i>S</i> ,6 <i>S</i> ,7 <i>S</i> ,8 <i>S</i> )-1-methyl-3-methylidene-8-propan-2-yltricyclo[4.4.0.0 <sup>2,7</sup> ]decane | $\beta$ -Copaene             | C <sub>15</sub> H <sub>24</sub> |   | 27.1<br>8 | 716 | 717 | 0.16      |
| 1,1,7-trimethyl-4-methylidene-2,3,4 <i>a</i> ,5,6,7,7 <i>a</i> ,7 <i>b</i> -octahydro-1 <i>aH</i> -cyclopropa[e]azulene       | Aromadendrene                | C <sub>15</sub> H <sub>24</sub> |  | 28.3<br>3 | 825 | 825 | 0.43      |
| (1 <i>S</i> ,5 <i>S</i> ,6 <i>R</i> )-2,6-dimethyl-6-(4-methylpent-3-enyl)bicyclo[3.1.1]hept-2-ene                            | trans- $\alpha$ -Bergamotene | C <sub>15</sub> H <sub>24</sub> |  | 28.6      | 727 | 726 | 0.24      |
| 1-methyl-4-(6-methylhept-5-en-2-yl)benzene                                                                                    | $\alpha$ -Curcumene          | C <sub>15</sub> H <sub>22</sub> |  | 28.9<br>6 | 896 | 896 | 13.9<br>7 |

|                                                                                                                                                                                                    |                     |                                   |                                                                                     |           |     |     |           |
|----------------------------------------------------------------------------------------------------------------------------------------------------------------------------------------------------|---------------------|-----------------------------------|-------------------------------------------------------------------------------------|-----------|-----|-----|-----------|
| (3 <i>R</i> ,4 <i>R</i> )-4-ethenyl-4-methyl-1-propan-2-yl-3-prop-1-en-2-ylcyclohexene                                                                                                             | $\delta$ -Elemene   | C <sub>15</sub> H <sub>24</sub>   | 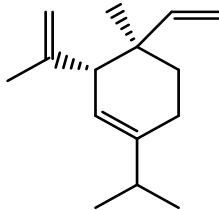  | 29.4<br>5 | 781 | 781 | 0.62      |
| (3 <i>E</i> ,6 <i>E</i> )-3,7,11-trimethyldodeca-1,3,6,10-tetraene                                                                                                                                 | $\alpha$ -Farnesene | C <sub>15</sub> H <sub>24</sub>   |   | 31.3<br>9 | 772 | 772 | 0.96      |
| (1 <i>aR</i> ,4 <i>aR</i> ,7 <i>S</i> ,7 <i>aR</i> ,7 <i>bR</i> )-1,1,7-trimethyl-4-methylidene-1 <i>a</i> ,2,3,4 <i>a</i> ,5,6,7 <i>a</i> ,7 <i>b</i> -octahydrocyclopropa[ <i>h</i> ]azulen-7-ol | Spathulenol         | C <sub>15</sub> H <sub>24</sub> O |   | 31.9<br>1 | 735 | 735 | 1.72      |
| 4,10,11,11-tetramethyltricyclo[5.3.1.0 <sup>1,5</sup> ]undecane                                                                                                                                    | Patchoulane         | C <sub>15</sub> H <sub>26</sub>   |  | 32.0<br>7 | 851 | 851 | 4.53      |
| Total                                                                                                                                                                                              |                     |                                   |                                                                                     |           |     |     | 100       |
| Phytochemical classification of <i>A. citrodora</i> EO                                                                                                                                             |                     |                                   |                                                                                     |           |     |     |           |
| Hydrocarbon monoterpene                                                                                                                                                                            |                     |                                   |                                                                                     |           |     |     | 18.3<br>1 |
| Oxygenated monoterpene                                                                                                                                                                             |                     |                                   |                                                                                     |           |     |     | 54.1<br>6 |
| Hydrocarbon sesquiterpene                                                                                                                                                                          |                     |                                   |                                                                                     |           |     |     | 25.6<br>3 |
| Oxygenated sesquiterpene                                                                                                                                                                           |                     |                                   |                                                                                     |           |     |     | 1.72      |
| Fatty alcohol                                                                                                                                                                                      |                     |                                   |                                                                                     |           |     |     | 0.18      |
| Total                                                                                                                                                                                              |                     |                                   |                                                                                     |           |     |     | 100       |

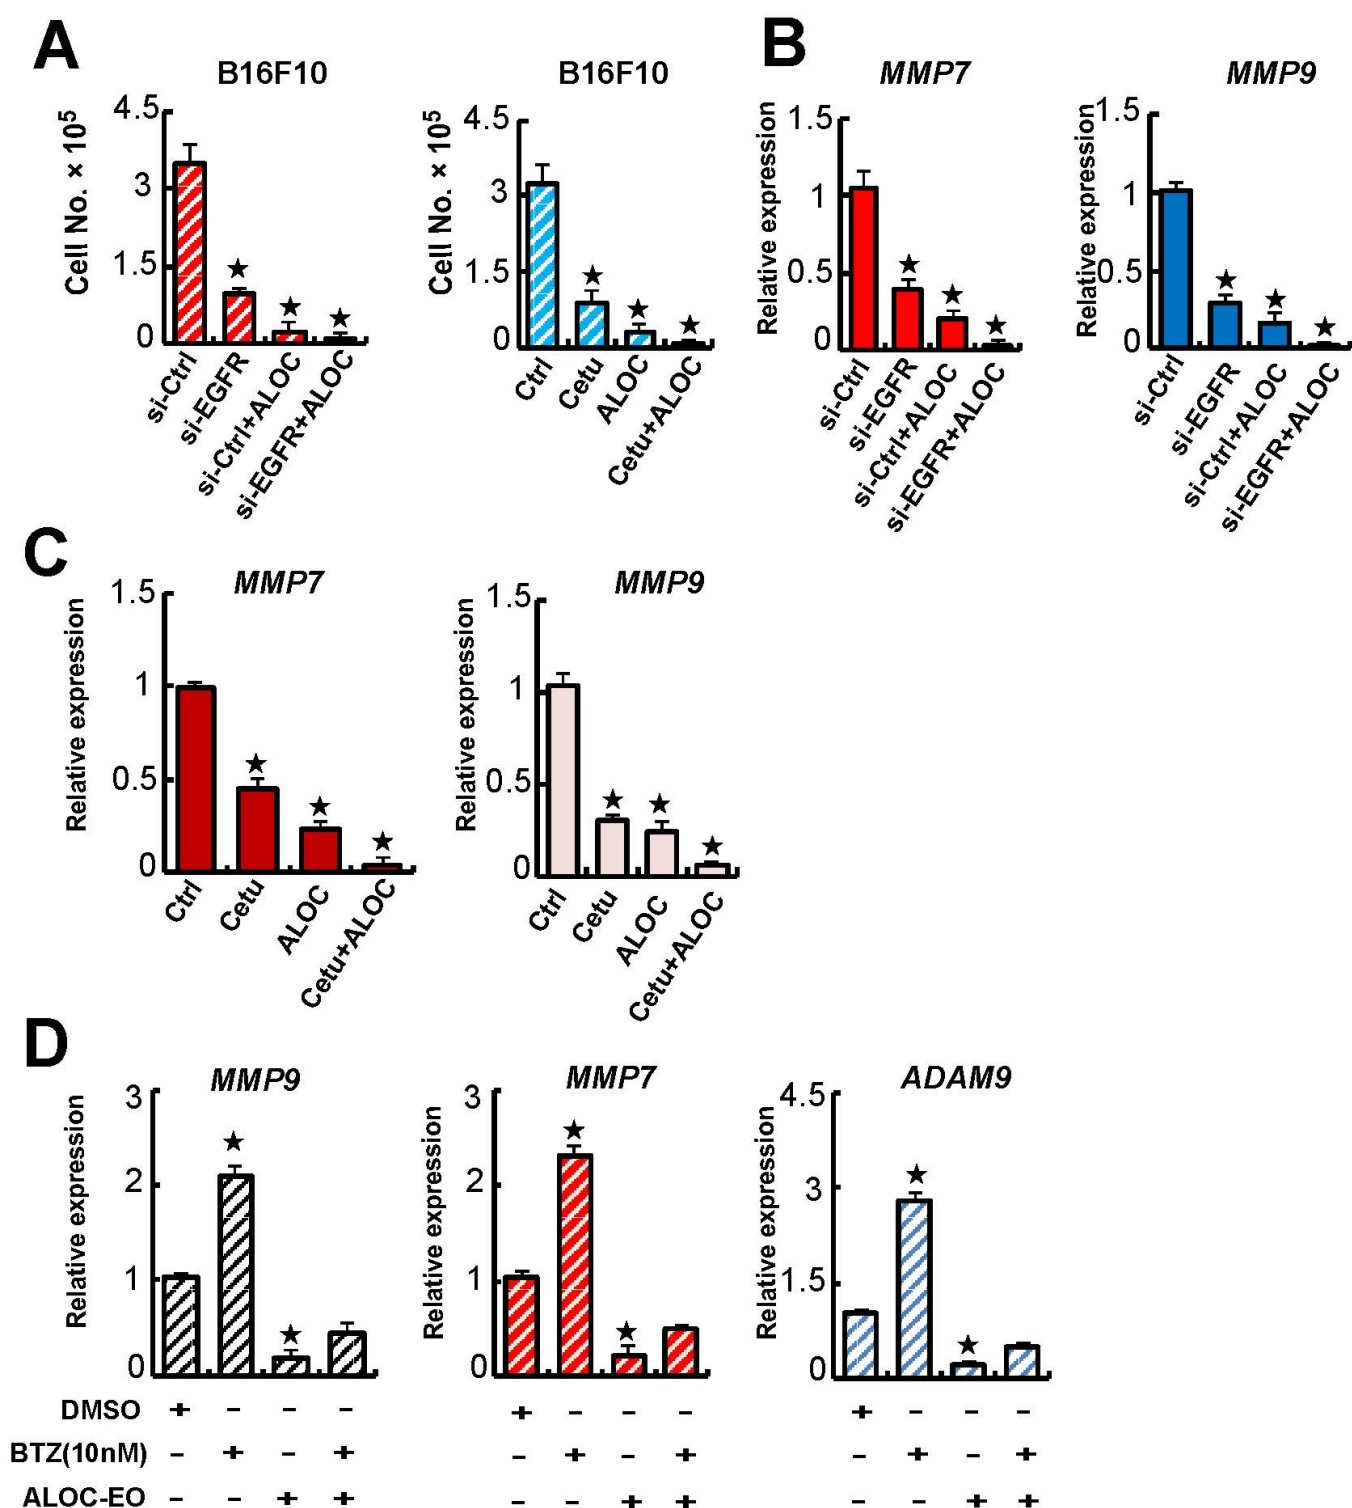

**Supplementary Figure S1.** ALOC-EC inhibits myelosuppression-induced protease expression. (A-C) B16F10 EGFR control cells or cells where EGFR had been blocked either by gene silencing with siRNA (si-EGFR; left panel) or due to the addition of neutralizing antibodies against EGFR (Cetuxamib) were cultured in the presence or absence of ALOC-EO (n=3/group). (A) Proliferation using a cell count was done after 24 h in culture. (B and C) Cells were collected 24 h after the addition of ALOC-EO as indicated, the expression of MMP7 and MMP9 were determined by qPCR. Presented is relative gene expression. Transcript levels were normalized to b-actin. (D) B16F10 cells

were treated with BTZ (10 nM) in the presence or absence of 100 ug/ml ALOC-EO. Fold expression of MMP7/9, ADAM9, in cells treated with indicated drug combinations as determined by qPCR. (G and H) Viable cells were counted after 24 h using the try-pan blue exclusion assay (n=6). The results of three independent experiments performed in triplicate are expressed as fold change according to  $2^{-\Delta\Delta CT}$  method using b-actin as calibrator. Transcript levels were normalized to b-actin (n=3/group).
